# Supplementary material
Source: HighWire-hosted journal article supplement (https://ajnr-sso.highwirestaging.com/highwire/filestream/52007/field_highwire_adjunct_files/0/2485_table.pdf)
Supplement: 2485_table.pdf [file 2485_table.pdf]

**On-line Table: Demographic data of 12 patients and characteristics of 22 emboli**

| Patient | Sex | Age (yr) | Pretreatment Diagnosis                                                                        | Procedure  | Specimen         |      | Source                                                            | Appearance and Composition                                       |
|---------|-----|----------|-----------------------------------------------------------------------------------------------|------------|------------------|------|-------------------------------------------------------------------|------------------------------------------------------------------|
|         |     |          |                                                                                               |            | No. <sup>a</sup> | Site |                                                                   |                                                                  |
| 1       | M   | 79       | Asymptomatic ICA stenosis                                                                     | CEA        | C1               | ICA  | Excessive thrombus removed from the plaque                        | Red, erythrocyte-rich                                            |
|         |     |          |                                                                                               |            | C2               | ICA  |                                                                   | Off-white, partially calcified, and fibrin-rich                  |
| 2       | F   | 77       | Asymptomatic ICA stenosis                                                                     | CEA        | C3               | ICA  | Thrombi loosely attached to luminal surface                       | Pink, platelet and fibrin-rich                                   |
|         |     |          |                                                                                               |            | C4               | ICA  |                                                                   | Pink, platelet and fibrin-rich                                   |
| 3       | M   | 68       | Asymptomatic ICA stenosis                                                                     | CEA        | C5               | ICA  |                                                                   | Red, platelet and fibrin-rich                                    |
|         |     |          |                                                                                               |            | C6               | ICA  |                                                                   | Off-white, fibrin-rich with cholesterol crystals                 |
| 4       | M   | 64       | AIS of the right MCA distribution with associated high-grade stenosis of the right ICA origin | Aspiration | A1               | MCA  | Artery-artery embolus associated with ipsilateral carotid disease | Red, fibrin, erythrocyte, platelet and leukocyte-rich            |
| 5       | M   | 65       | AIS of the right MCA distribution with associated high-grade stenosis of the right ICA origin | Aspiration | A2               | ICA  | Artery-artery embolus associated with ipsilateral carotid disease | Red, fibrin, erythrocyte, platelet and leukocyte-rich            |
| 6       | M   | 79       | Asymptomatic ICA stenosis                                                                     | CEA        | C7               | ICA  | Thrombi loosely attached to luminal surface                       | Yellow-white, calcified                                          |
| 7       | M   | 74       | Asymptomatic ICA stenosis                                                                     | CEA        | C8               | ICA  |                                                                   | Dark reddish brown, lipid, packed fibrin, fibronectin, and cells |
|         |     |          |                                                                                               |            | C9               | ICA  |                                                                   |                                                                  |
| 8       | M   | 72       | Asymptomatic ICA stenosis                                                                     | CEA        | C10              | ICA  | Cardioembolic                                                     | Red, fibrin, erythrocyte and platelet-rich                       |
|         |     |          |                                                                                               |            | C11              | ICA  |                                                                   |                                                                  |
| 9       | F   | 78       | AIS of the left MCA distribution                                                              | Aspiration | A3               | MCA  | Cardioembolic                                                     | Red, fibrin, erythrocyte, platelet and leukocyte-rich            |
| 10      | M   | 54       | AIS of the left MCA distribution                                                              | Aspiration | A4-A9            | MCA  | Cardioembolic                                                     | Red, fibrin, erythrocyte, platelet and leukocyte-rich            |
| 11      | M   | 53       | Symptomatic ICA stenosis                                                                      | CEA        | C12              | ICA  | Thrombi loosely attached to fatty streak                          | Red, fibrin, erythrocyte and leukocyte-rich                      |
| 12      | M   | 81       | Asymptomatic ICA stenosis                                                                     | CEA        | C13              | ICA  | Thrombi loosely attached to luminal surface                       | Dark reddish brown, lipid-rich                                   |

<sup>a</sup> The sample number is determined by the procedure type followed by an integer denoting the order in which it was obtained.
